# Supplementary material for: Prediction of human-Bacillus anthracis protein–protein interactions using multi-layer neural network
Source: Oxford University Press journal article supplement (doi:10.1093/bioinformatics/bty504), 2018-06-24
Supplement: bioinformatics_34_24_4159_s1.pdf [file bioinformatics_34_24_4159_s1.pdf]

# Supplementary Information

May 22, 2018

We plot the Precision versus Recall Curve (PR) and ROC curve for our methods using both Neural network and SVM.

## 1. Comparison of SVM and Neural network using Triplet features.

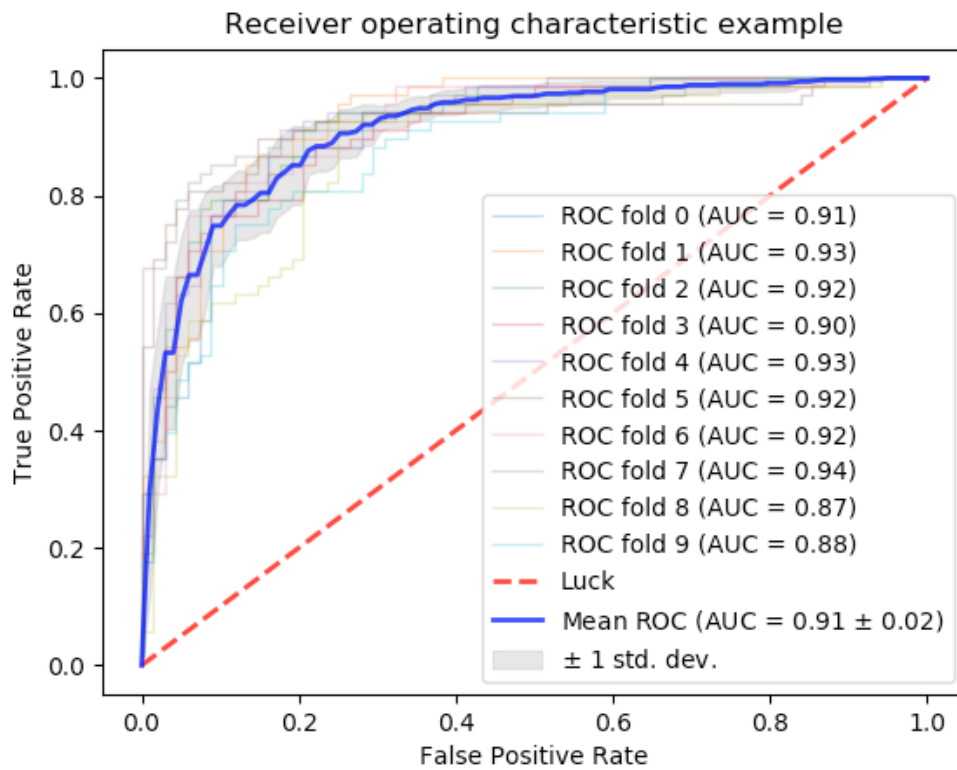

Figure 1: A ROC curve shows the performance of SVM using the Triplet feature combination.

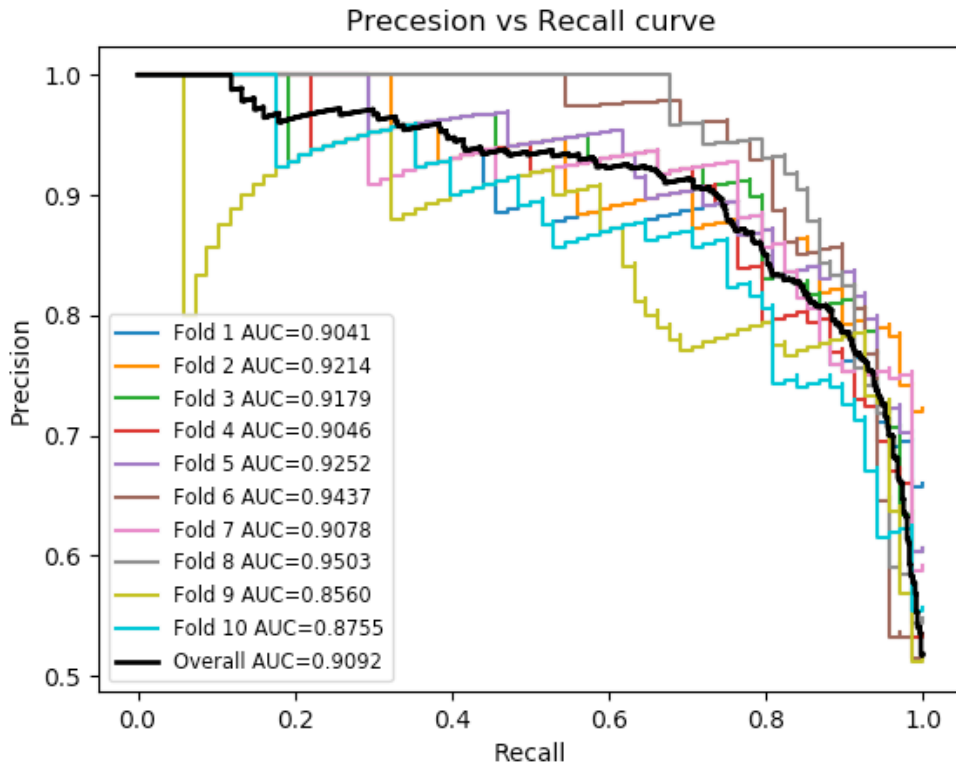

**Figure 2: A PR curve shows the performance of SVM using the Triplet feature combination.**

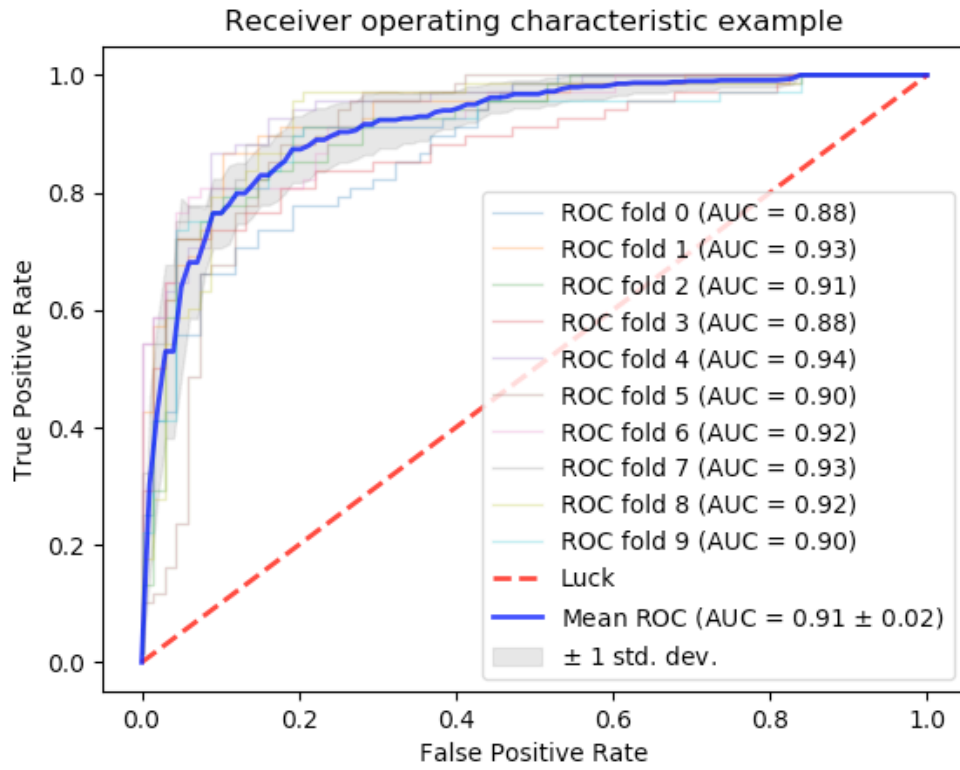

**Figure 3: A ROC curve shows the performance of the neural network using the Triplet feature combination.**

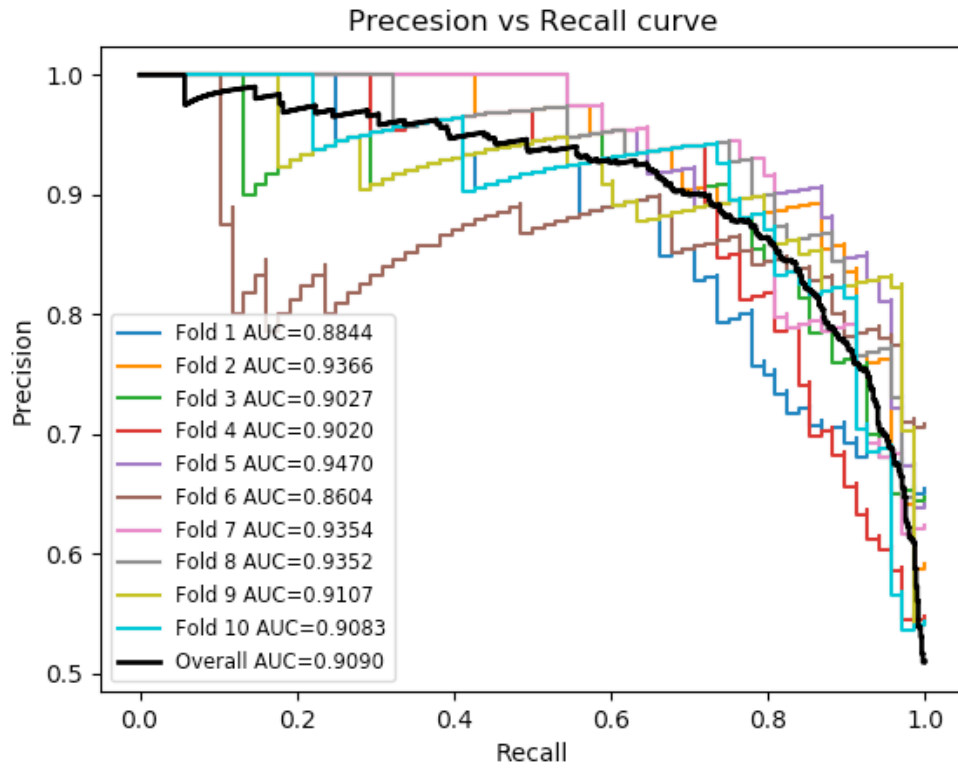

Figure 4: A PR curve shows the performance of the neural network using the Triplet feature combination.

## 2. Comparison of SVM and neural network using the Quadruplet features.

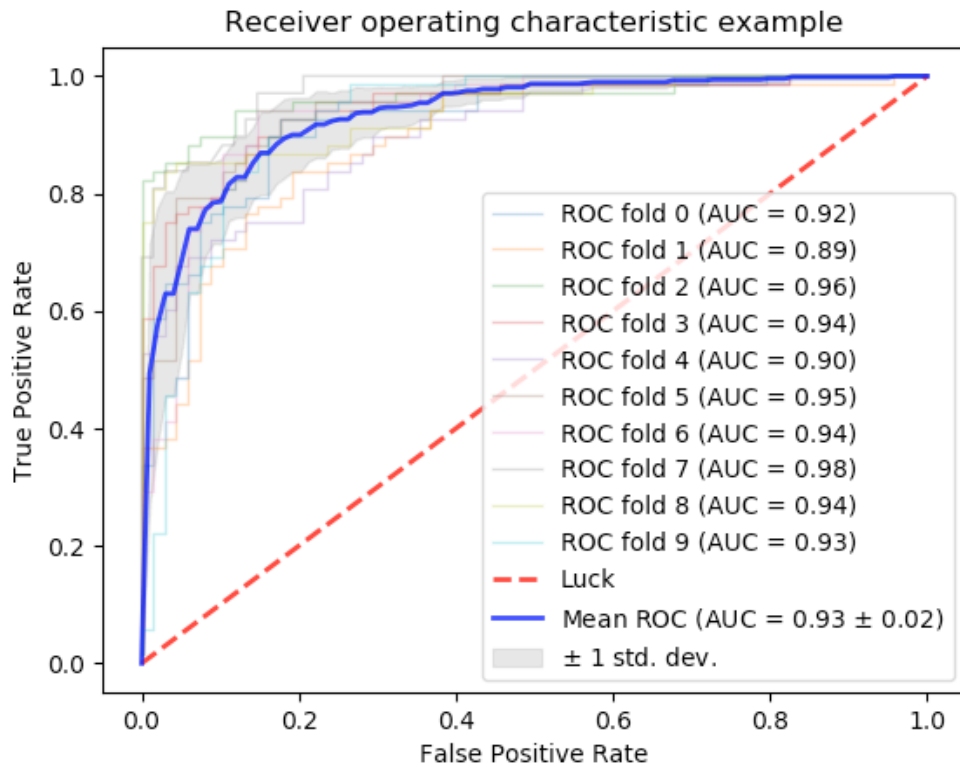

Figure 5: A ROC curve shows the performance of SVM using the Quadruplet feature combination.

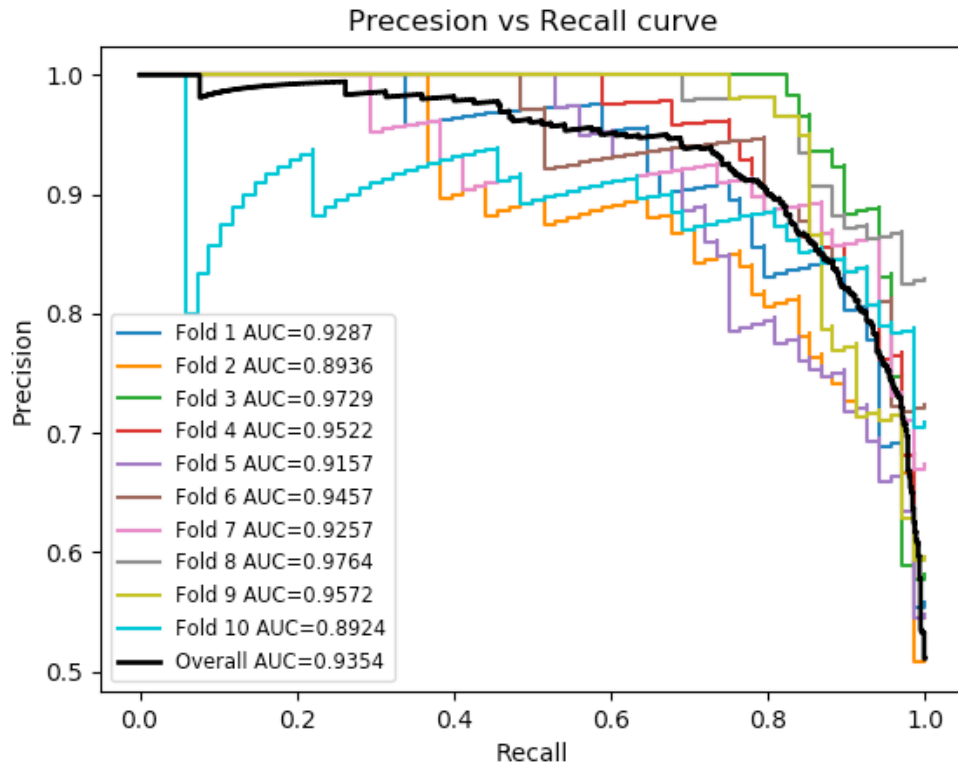

Figure 6: A PR curve shows the performance of SVM using the Quadruplet feature combination.

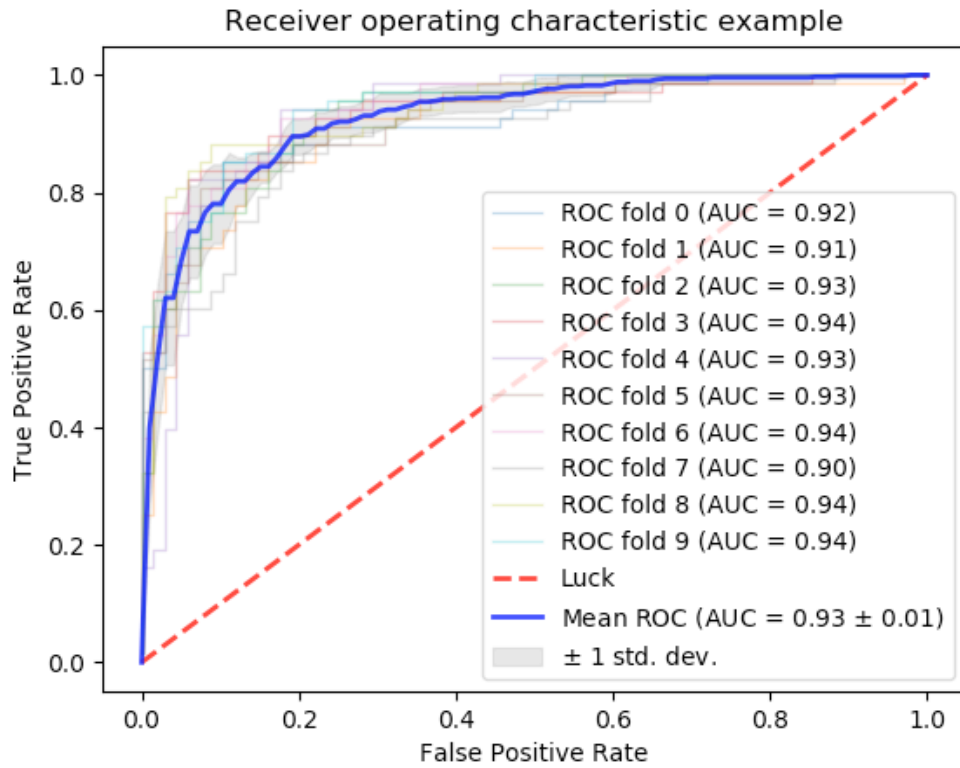

**Figure 7: A ROC curve shows the performance of the neural network using the Quadruplet feature combination.**

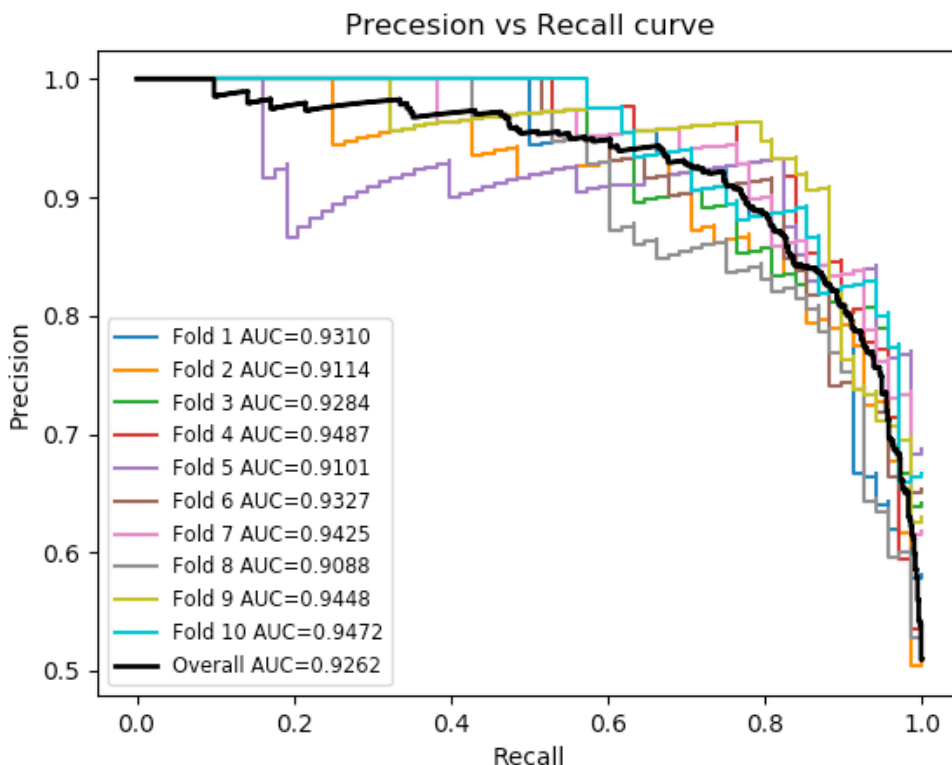

Figure 8: A PR curve shows the performance of the neural network using the Quadruplet feature combination.

## GO annotation

Table A1: Top 100 Molecular Process GO terms for the GO term enrichment analysis.

| Category         | Term                                  | PValue               |
|------------------|---------------------------------------|----------------------|
| INTERPRO         | IPR007125:Histone core                | 3.65349326275522E-37 |
| GOTERM_CC_DIRECT | GO:0000786~nucleosome                 | 2.43423010118002E-36 |
| UP_KEYWORDS      | Nucleosome core                       | 7.13593376841717E-35 |
| INTERPRO         | IPR009072:Histone-fold                | 1.38216429044505E-30 |
| UP_KEYWORDS      | Chromosome                            | 7.61307939387112E-28 |
| GOTERM_BP_DIRECT | GO:0006334~nucleosome assembly        | 9.00343200872661E-27 |
| KEGG_PATHWAY     | hsa05322:Systemic lupus erythematosus | 6.34936232722818E-24 |
| KEGG_PATHWAY     | hsa05034:Alcoholism                   | 1.91812753940534E-22 |
| INTERPRO         | IPR000558:Histone H2B                 | 2.26171463863757E-21 |
| SMART            | SM00427:H2B                           | 7.57396955300955E-21 |
| INTERPRO         | IPR002119:Histone H2A                 | 1.29355366119837E-20 |
| SMART            | SM00414:H2A                           | 4.32250667155666E-20 |
| GOTERM_CC_DIRECT | GO:0000788~nuclear nucleosome         | 2.66105960507447E-19 |
| UP_SEQ_FEATURE   | cross-link:Glycyl lysine isopeptide   | 2.04910052528619E-17 |



(Lys-Gly) (interchain with G-Cter in ubiquitin)

|                  |                                                                                                                 |                        |
|------------------|-----------------------------------------------------------------------------------------------------------------|------------------------|
| GOTERM_MF_DIRECT | GO:0046982~protein heterodimerization activity                                                                  | 2.72889743627416E-17   |
| GOTERM_BP_DIRECT | GO:0006342~chromatin silencing                                                                                  | 5.30090331770102E-16   |
| INTERPRO         | IPR001828:Extracellular ligand-binding receptor                                                                 | 1.23371872543808E-14   |
| UP_KEYWORDS      | Citrullination                                                                                                  | 3.73733713733252E-12   |
| UP_KEYWORDS      | Isopeptide bond                                                                                                 | 9.60397553554832E-11   |
| GOTERM_CC_DIRECT | GO:0000790~nuclear chromatin                                                                                    | 1.34527183995609E-10   |
| GOTERM_MF_DIRECT | GO:0008066~glutamate receptor activity                                                                          | 1.82055268260038E-10   |
| COG_ONTOLOGY     | Secondary metabolites biosynthesis, transport, and catabolism                                                   | 5.0315506932937E-10    |
| INTERPRO         | IPR000162:GPCR, family metabotropic glutamate receptor                                                          | 3,6.20519485465986E-10 |
| INTERPRO         | IPR001664:Intermediate filament protein                                                                         | 6.2144162333427E-10    |
| INTERPRO         | IPR018039:Intermediate filament protein, conserved site                                                         | 6.92089271395323E-10   |
| INTERPRO         | IPR001128:Cytochrome P450                                                                                       | 6.92089271395323E-10   |
| SMART            | SM00526:H15                                                                                                     | 1.11377256223149E-09   |
| UP_KEYWORDS      | Ubl conjugation                                                                                                 | 1.14010591435489E-09   |
| INTERPRO         | IPR005818:Histone H1/H5                                                                                         | 1.1768348685354E-09    |
| INTERPRO         | IPR005819:Histone H5                                                                                            | 1.83499676179109E-09   |
| UP_KEYWORDS      | Intermediate filament                                                                                           | 3.78686477536436E-09   |
| UP_KEYWORDS      | Keratin                                                                                                         | 0.000000004            |
| GOTERM_MF_DIRECT | GO:0016705~oxidoreductase activity acting on paired donors, with incorporation or reduction of molecular oxygen | 4.93016240464767E-09   |
| GOTERM_MF_DIRECT | GO:0031490~chromatin DNA binding                                                                                | 0.000000006            |
| INTERPRO         | IPR002401:Cytochrome P450, class, group I                                                                       | E-9.69135969516511E-09 |
| UP_SEQ_FEATURE   | region of interest:Linker 12                                                                                    | 1.22175738637668E-08   |
| UP_SEQ_FEATURE   | region of interest:Coil 2                                                                                       | 1.22175738637668E-08   |
| UP_KEYWORDS      | Monoxygenase                                                                                                    | 1.80504717860746E-08   |
| UP_SEQ_FEATURE   | region of interest:Coil 1A                                                                                      | 3.05359175552811E-08   |
| UP_SEQ_FEATURE   | region of interest:Coil 1B                                                                                      | 3.05359175552811E-08   |
| UP_SEQ_FEATURE   | region of interest:Linker 1                                                                                     | 3.05359175552811E-08   |
| UP_SEQ_FEATURE   | region of interest:Rod                                                                                          | 3.52694187300906E-08   |
| INTERPRO         | IPR011500:GPCR, family 3, cysteines domain                                                                      | 3.53935538346141E-08   |
| INTERPRO         | IPR017972:Cytochrome P450, conserved site                                                                       | 4.36598640740941E-08   |
| UP_SEQ_FEATURE   | region of interest:Head                                                                                         | 4.67367776049593E-08   |
| INTERPRO         | IPR003663:Sugar/inositol transporter                                                                            | 6.10560931677928E-08   |
| INTERPRO         | IPR000337:GPCR, family 3                                                                                        | 6.10560931677928E-08   |

|                  |                                                                                                |                        |
|------------------|------------------------------------------------------------------------------------------------|------------------------|
| INTERPRO         | IPR017979:GPCR, family conserved site                                                          | 3,6.10560931677928E-08 |
| UP_SEQ_FEATURE   | region of interest:Tail                                                                        | 6.14061702057403E-08   |
| UP_SEQ_FEATURE   | metal ion-binding site:Iron (heme axial ligand)                                                | 7.47445356334567E-08   |
| GOTERM_BP_DIRECT | GO:0051966~regulation of synaptic transmission, glutamatergic                                  | 8.24594316784265E-08   |
| SMART            | SM01391:SM01391                                                                                | 1.25707196599359E-07   |
| UP_KEYWORDS      | Methylation                                                                                    | 0.000000134            |
| INTERPRO         | IPR017892:Protein kinase, C-terminal                                                           | 5.5271939085759E-07    |
| KEGG_PATHWAY     | hsa05203:Viral carcinogenesis                                                                  | 6.19379472146183E-07   |
| GOTERM_MF_DIRECT | GO:0004497~monooxygenase activity                                                              | 0.000000893            |
| UP_KEYWORDS      | DNA-binding                                                                                    | 9.54570251870342E-07   |
| PIR_SUPERFAMILY  | PIRSF000606:ribosomal protein kinase II                                                        | S61.02228343828706E-06 |
| INTERPRO         | IPR002957:Keratin, type I                                                                      | 1.11027245300377E-06   |
| INTERPRO         | IPR016239:Ribosomal protein kinase II                                                          | S61.18913205213016E-06 |
| INTERPRO         | IPR017978:GPCR, family 3, C-terminal                                                           | 1.35263942132106E-06   |
| UP_KEYWORDS      | Heme                                                                                           | 1.62506592187357E-06   |
| GOTERM_BP_DIRECT | GO:0007196~adenylate cyclase-inhibiting G-protein coupled glutamate receptor signaling pathway | 2.92761803888102E-06   |
| UP_SEQ_FEATURE   | domain:Protein kinase 2                                                                        | 2.92947220979866E-06   |
| UP_SEQ_FEATURE   | domain:Protein kinase 1                                                                        | 2.92947220979866E-06   |
| UP_SEQ_FEATURE   | domain:AGC-kinase C-terminal                                                                   | 0.000003288            |
| UP_KEYWORDS      | Sugar transport                                                                                | 3.81974920461412E-06   |
| GOTERM_CC_DIRECT | GO:0005882~intermediate filament                                                               | 3.82810751364596E-06   |
| INTERPRO         | IPR000961:AGC-kinase, C-terminal                                                               | 4.40927461655415E-06   |
| INTERPRO         | IPR011009:Protein kinase-like domain                                                           | 4.61728031762149E-06   |
| GOTERM_MF_DIRECT | GO:0005355~glucose transmembrane transporter activity                                          | 4.82287854569449E-06   |
| UP_KEYWORDS      | Phosphoprotein                                                                                 | 6.49361509196284E-06   |
| GOTERM_MF_DIRECT | GO:0055056~D-glucose transmembrane transporter activity                                        | 6.90779114082241E-06   |
| GOTERM_MF_DIRECT | GO:0020037~heme binding                                                                        | 7.23954758562426E-06   |
| GOTERM_MF_DIRECT | GO:0004672~protein kinase activity                                                             | 8.99919232847702E-06   |
| INTERPRO         | IPR000719:Protein kinase, catalytic domain                                                     | 1.05045439169985E-05   |
| INTERPRO         | IPR005829:Sugar transporter, conserved site                                                    | 1.17356830492327E-05   |
| GOTERM_BP_DIRECT | GO:1904659~glucose transmembrane transport                                                     | 1.41500967700848E-05   |
| GOTERM_BP_DIRECT | GO:0006468~protein phosphorylation                                                             | 1.50703452836783E-05   |
| GOTERM_CC_DIRECT | GO:0031090~organelle membrane                                                                  | 1.7914553067169E-05    |
| UP_KEYWORDS      | Nucleus                                                                                        | 1.85103024932415E-05   |
| GOTERM_MF_DIRECT | GO:0005506~iron ion binding                                                                    | 0.000022235            |

|                  |                                                                            |                      |
|------------------|----------------------------------------------------------------------------|----------------------|
| GOTERM_BP_DIRECT | GO:0097192~extrinsic apoptotic signaling pathway in absence of ligand      | 0.000022555          |
| GOTERM_MF_DIRECT | GO:0001642~group III metabotropic glutamate receptor activity              | 2.30510703747751E-05 |
| UP_SEQ_FEATURE   | site:Stutter                                                               | 2.30910657311161E-05 |
| UP_KEYWORDS      | Apoptosis                                                                  | 2.33982526752892E-05 |
| INTERPRO         | IPR008271:Serine/threonine-protein kinase, active site                     | 2.61082617768074E-05 |
| INTERPRO         | IPR005828:General transporter                                              | 3.4013933173423E-05  |
| SMART            | SM00133:S_TK_X                                                             | 3.61102727482237E-05 |
| GOTERM_MF_DIRECT | GO:0008048~calcium guanylate cyclase activator activity                    | 0.000056855          |
| GOTERM_MF_DIRECT | GO:0004674~protein serine/threonine kinase activity                        | 5.75204532487123E-05 |
| UP_KEYWORDS      | Acetylation                                                                | 6.60103900370156E-05 |
| UP_KEYWORDS      | Serine/threonine-protein kinase                                            | 8.03841207642006E-05 |
| SMART            | SM00220:S_TKc                                                              | 0.0001313185         |
| GOTERM_MF_DIRECT | GO:0003677~DNA binding                                                     | 0.0001373038         |
| GOTERM_BP_DIRECT | GO:0006915~apoptotic process                                               | 0.0001405168         |
| KEGG_PATHWAY     | hsa04150:mTOR signaling pathway                                            | 0.0001463087         |
| GOTERM_BP_DIRECT | GO:0008630~intrinsic apoptotic signaling pathway in response to DNA damage | 0.0001491923         |
| GOTERM_MF_DIRECT | GO:0004712~protein serine/threonine/tyrosine kinase activity               | 0.0001549701         |

**Table A2: Top 100 Biological Process GO terms for the GO term enrichment analysis.**

| Category         | Term                                 | PValue               |
|------------------|--------------------------------------|----------------------|
| UP_KEYWORDS      | Phosphoprotein                       | 5.0044899043346E-32  |
| UP_KEYWORDS      | Acetylation                          | 2.64467141119124E-26 |
| GOTERM_MF_DIRECT | GO:0005515~protein binding           | 4.07451020341506E-24 |
| UP_KEYWORDS      | Coiled coil                          | 1.612015918744E-14   |
| UP_KEYWORDS      | Cytoplasm                            | 3.96063951520805E-13 |
| GOTERM_CC_DIRECT | GO:0070062~extracellular exosome     | 6.97439870882117E-13 |
| GOTERM_CC_DIRECT | GO:0005829~cytosol                   | 9.01674455821302E-13 |
| UP_KEYWORDS      | Nucleus                              | 1.09026047569525E-12 |
| UP_KEYWORDS      | Alternative splicing                 | 2.30052040538826E-12 |
| GOTERM_CC_DIRECT | GO:0005654~nucleoplasm               | 2.32038682302786E-11 |
| GOTERM_CC_DIRECT | GO:0005737~cytoplasm                 | 4.09253604848023E-11 |
| UP_KEYWORDS      | Ubl conjugation                      | 5.57223631070431E-11 |
| GOTERM_CC_DIRECT | GO:0016020~membrane                  | 1.31846840573167E-09 |
| UP_KEYWORDS      | Cytoskeleton                         | 4.54845469734698E-09 |
| GOTERM_MF_DIRECT | GO:0044822~poly(A) RNA binding       | 5.5555879629038E-09  |
| GOTERM_MF_DIRECT | GO:0042802~identical protein binding | 7.53804123347829E-09 |
| GOTERM_CC_DIRECT | GO:0005634~nucleus                   | 6.54280214025877E-08 |

|                  |                                                                                   |                      |
|------------------|-----------------------------------------------------------------------------------|----------------------|
| UP_KEYWORDS      | Methylation                                                                       | 1.56873755210856E-07 |
| UP_KEYWORDS      | Isopeptide bond                                                                   | 3.91797242233896E-07 |
| INTERPRO         | IPR003006:Immunoglobulin/major histocompatibility complex, conserved site         | 6.67936850617508E-07 |
| GOTERM_CC_DIRECT | GO:0012507~ER to Golgi transport vesicle membrane                                 | 0.00000199           |
| UP_SEQ_FEATURE   | splice variant                                                                    | 2.11714057165608E-06 |
| GOTERM_BP_DIRECT | GO:0002474~antigen processing and presentation of peptide antigen via MHC class I | 4.35846117055486E-06 |
| GOTERM_MF_DIRECT | GO:0098641~cadherin binding involved in cell-cell adhesion                        | 5.43881188807899E-06 |
| KEGG_PATHWAY     | hsa04144:Endocytosis                                                              | 9.08234950816851E-06 |
| GOTERM_CC_DIRECT | GO:0000139~Golgi membrane                                                         | 1.06116535532344E-05 |
| GOTERM_CC_DIRECT | GO:0005913~cell-cell adherens junction                                            | 1.31681383460131E-05 |
| INTERPRO         | IPR003597:Immunoglobulin C1-set                                                   | 1.71938774580145E-05 |
| GOTERM_BP_DIRECT | GO:1903214~regulation of protein targeting to mitochondrion                       | 1.84413085953306E-05 |
| UP_KEYWORDS      | Transcription regulation                                                          | 0.000023844          |
| GOTERM_CC_DIRECT | GO:0005925~focal adhesion                                                         | 2.54896138568061E-05 |
| UP_KEYWORDS      | Transcription                                                                     | 3.44630695522221E-05 |
| SMART            | SM00407:IGc1                                                                      | 4.5627634964999E-05  |
| UP_KEYWORDS      | Repressor                                                                         | 4.91942287155166E-05 |
| UP_KEYWORDS      | Host-virus interaction                                                            | 6.04232862684827E-05 |
| KEGG_PATHWAY     | hsa04612:Antigen processing and presentation                                      | 6.67131784716876E-05 |
| GOTERM_MF_DIRECT | GO:0051015~actin filament binding                                                 | 6.67741431444652E-05 |
| INTERPRO         | IPR012677:Nucleotide-binding, alpha-beta plait                                    | 8.20297715205839E-05 |
| UP_KEYWORDS      | Chaperone                                                                         | 8.30289478444858E-05 |
| GOTERM_CC_DIRECT | GO:0005813~centrosome                                                             | 0.000095778          |
| GOTERM_CC_DIRECT | GO:0031012~extracellular matrix                                                   | 0.0001273124         |
| INTERPRO         | IPR000504:RNA recognition motif domain                                            | 0.0001529405         |
| UP_KEYWORDS      | TPR repeat                                                                        | 0.0001979371         |
| GOTERM_MF_DIRECT | GO:0000166~nucleotide binding                                                     | 0.0002315313         |
| GOTERM_CC_DIRECT | GO:0005635~nuclear envelope                                                       | 0.0002437174         |
| UP_KEYWORDS      | Activator                                                                         | 0.0003106421         |
| GOTERM_BP_DIRECT | GO:0045944~positive regulation of transcription from RNA polymerase II promoter   | 0.0003668543         |
| UP_SEQ_FEATURE   | repeat:TPR 3                                                                      | 0.0003763571         |
| GOTERM_BP_DIRECT | GO:0050690~regulation of defense response to virus by virus                       | 0.0004117331         |
| SMART            | SM00360:RRM                                                                       | 0.0004631871         |
| GOTERM_BP_DIRECT | GO:0008380~RNA splicing                                                           | 0.0004987789         |

|                  |                                                                                                              |              |
|------------------|--------------------------------------------------------------------------------------------------------------|--------------|
| GOTERM_BP_DIRECT | GO:0098609~cell-cell adhesion                                                                                | 0.0006091817 |
| GOTERM_BP_DIRECT | GO:0002479~antigen processing and presentation of exogenous peptide antigen via MHC class I, TAP-dependent   | 0.0006146298 |
| GOTERM_MF_DIRECT | GO:0019901~protein kinase binding                                                                            | 0.000621654  |
| GOTERM_CC_DIRECT | GO:0072562~blood microparticle                                                                               | 0.0006249689 |
| GOTERM_BP_DIRECT | GO:0045892~negative regulation of transcription, DNA-templated                                               | 0.0006311634 |
| UP_KEYWORDS      | Chromosomal rearrangement                                                                                    | 0.0006573113 |
| KEGG_PATHWAY     | hsa05212:Pancreatic cancer                                                                                   | 0.0007877228 |
| UP_SEQ_FEATURE   | repeat:TPR 2                                                                                                 | 0.0007969853 |
| UP_SEQ_FEATURE   | repeat:TPR 1                                                                                                 | 0.0007969853 |
| UP_KEYWORDS      | WD repeat                                                                                                    | 0.0008312822 |
| GOTERM_BP_DIRECT | GO:0006366~transcription from RNA polymerase II promoter                                                     | 0.000923402  |
| GOTERM_BP_DIRECT | GO:0002480~antigen processing and presentation of exogenous peptide antigen via MHC class I, TAP-independent | 0.0009339995 |
| GOTERM_MF_DIRECT | GO:0019899~enzyme binding                                                                                    | 0.0009523223 |
| UP_KEYWORDS      | MHC I                                                                                                        | 0.0009547082 |
| GOTERM_CC_DIRECT | GO:0005794~Golgi apparatus                                                                                   | 0.0009982712 |
| UP_SEQ_FEATURE   | domain:Thioredoxin 2                                                                                         | 0.0010276836 |
| UP_SEQ_FEATURE   | domain:Thioredoxin 1                                                                                         | 0.0010276836 |
| UP_SEQ_FEATURE   | region of interest:Alpha-3                                                                                   | 0.0010276836 |
| UP_KEYWORDS      | Cell cycle                                                                                                   | 0.0011495875 |
| GOTERM_MF_DIRECT | GO:0051082~unfolded protein binding                                                                          | 0.0011531058 |
| UP_SEQ_FEATURE   | short sequence motif:Nuclear localization signal                                                             | 0.0012059658 |
| GOTERM_CC_DIRECT | GO:0005681~spliceosomal complex                                                                              | 0.001206348  |
| UP_KEYWORDS      | Tumor suppressor                                                                                             | 0.0012118346 |
| GOTERM_CC_DIRECT | GO:0015629~actin cytoskeleton                                                                                | 0.0012859777 |
| INTERPRO         | IPR017986:WD40-repeat-containing domain                                                                      | 0.0013026928 |
| UP_KEYWORDS      | Proto-oncogene                                                                                               | 0.0013673448 |
| GOTERM_CC_DIRECT | GO:0017053~transcriptional repressor complex                                                                 | 0.0013759607 |
| UP_SEQ_FEATURE   | domain:RRM 2                                                                                                 | 0.0014326651 |
| UP_SEQ_FEATURE   | domain:RRM 1                                                                                                 | 0.0014326651 |
| UP_KEYWORDS      | Cytoplasmic vesicle                                                                                          | 0.0014726464 |
| UP_SEQ_FEATURE   | compositionally biased region:Gln-rich                                                                       | 0.0015747052 |
| GOTERM_CC_DIRECT | GO:0042612~MHC class I protein complex                                                                       | 0.0015964784 |
| UP_KEYWORDS      | DNA-binding                                                                                                  | 0.0016021433 |
| GOTERM_BP_DIRECT | GO:0007050~cell cycle arrest                                                                                 | 0.0016625775 |

|                  |                                                            |              |
|------------------|------------------------------------------------------------|--------------|
| UP_KEYWORDS      | Disease mutation                                           | 0.0017026487 |
| GOTERM_CC_DIRECT | GO:0005783~endoplasmic reticulum                           | 0.0018822363 |
| GOTERM_CC_DIRECT | GO:0016607~nuclear speck                                   | 0.0019211201 |
| INTERPRO         | IPR001007: von Willebrand factor, type C                   | 0.0019577248 |
| INTERPRO         | IPR013766: Thioredoxin domain                              | 0.0019577248 |
| GOTERM_CC_DIRECT | GO:0005769~early endosome                                  | 0.0019819768 |
| GOTERM_CC_DIRECT | GO:0008540~proteasome regulatory particle, base subcomplex | 0.0020935517 |
| KEGG_PATHWAY     | hsa05416: Viral myocarditis                                | 0.0021089103 |
| GOTERM_MF_DIRECT | GO:0030742~GTP-dependent protein binding                   | 0.0022048031 |
| GOTERM_CC_DIRECT | GO:0043209~myelin sheath                                   | 0.0022286707 |
| GOTERM_BP_DIRECT | GO:0036498~IRE1-mediated unfolded protein response         | 0.0023794822 |
| INTERPRO         | IPR001680: WD40 repeat                                     | 0.0025729684 |
| SMART            | SM00214: VWC                                               | 0.0026302978 |
| UP_SEQ_FEATURE   | repeat: WD 1                                               | 0.0026713103 |
